# Supplementary material
Source: HighWire-hosted journal article supplement (http://d2538ggaoe6cji.cloudfront.net/highwire/filestream/44874/field_highwire_adjunct_files/0/150474-1.pdf)
Supplement: 150474-1.pdf [file 150474-1.pdf]

# Supplementary Information

Impact of domain knowledge on predictions of binding energies by alchemical free energy calculations

A. S.J.S. Mey, J. Juárez-Jiménez, J. Michel

June 15, 2017

## Contents

|          |                                                                      |          |
|----------|----------------------------------------------------------------------|----------|
| <b>1</b> | <b>Perturbations for LitSet1 and LitSet2</b>                         | <b>1</b> |
| <b>2</b> | <b>Scaling for LitSet1 and LitSet2</b>                               | <b>2</b> |
| <b>3</b> | <b>Details of Alchemical free energy protocols for Set1 and Set2</b> | <b>3</b> |
| <b>4</b> | <b>Comparison to other Protocols</b>                                 | <b>4</b> |

## 1 Perturbations for LitSet1 and LitSet2

The perturbation maps of LitSet1 and LitSet2 can be found in figure 1 and figure 3.

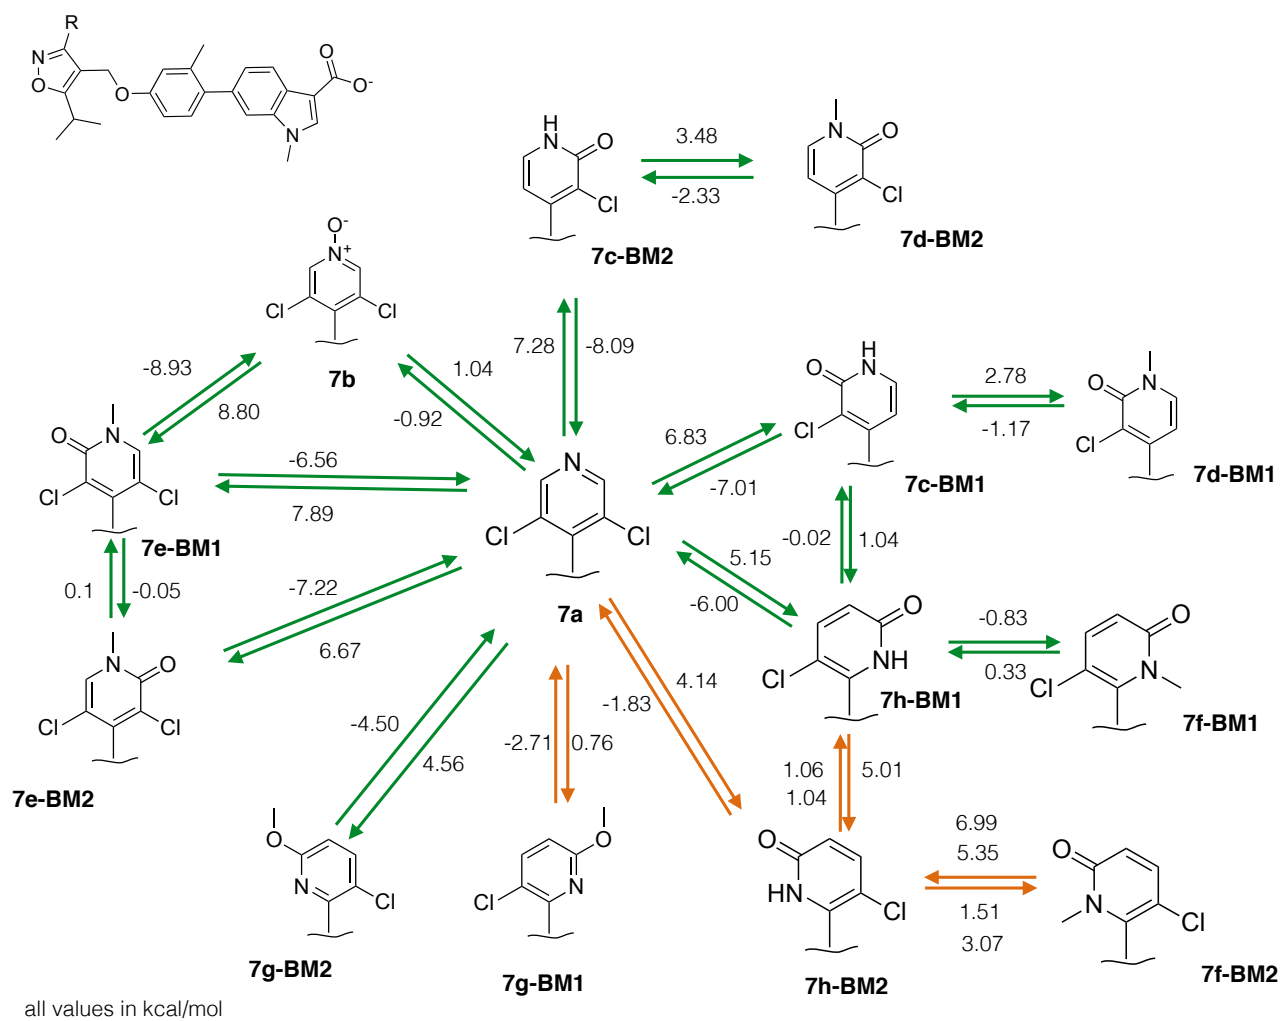

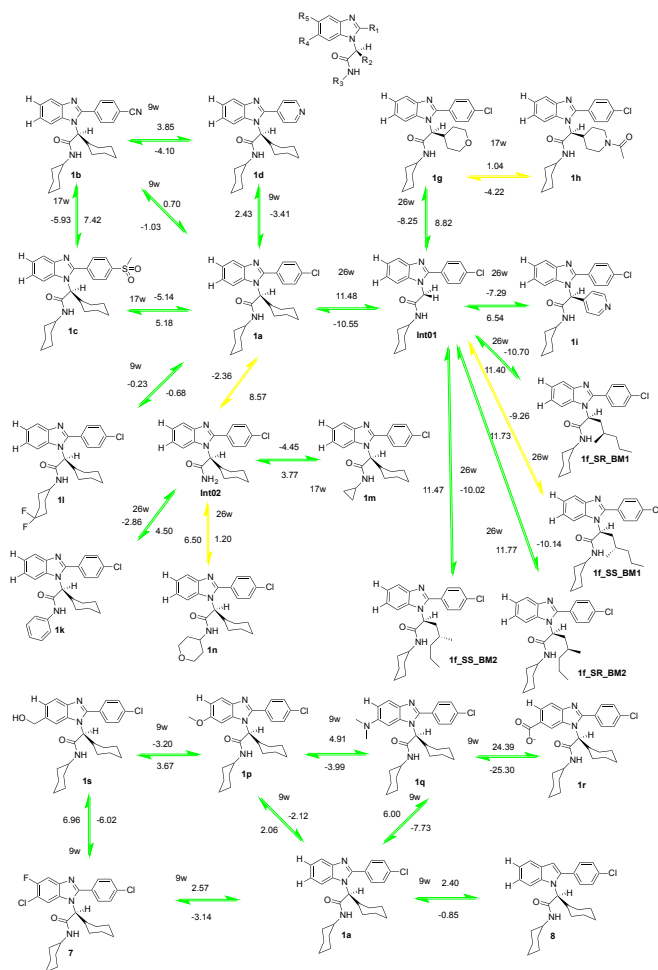

Figure 2: Perturbation map for LitSet2

## 2 Scaling for LitSet1 and LitSet2

Figure 3 and figure 4, show the scaling (1 - 0.5 and experimental values) of the estimated free energies (A) and the resulting Pearson correlation coefficient (B) for LitSet1 and LitSet2 respectively.

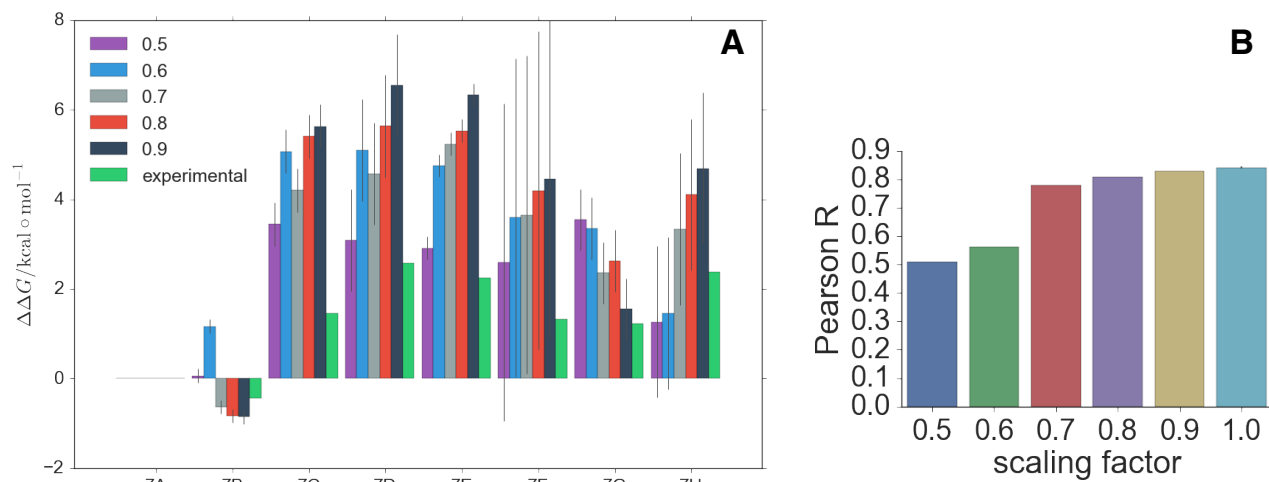

Figure 3: A: Scaling of estimated free energies for LitSet1 compounds, B: resulting correlation for scaling

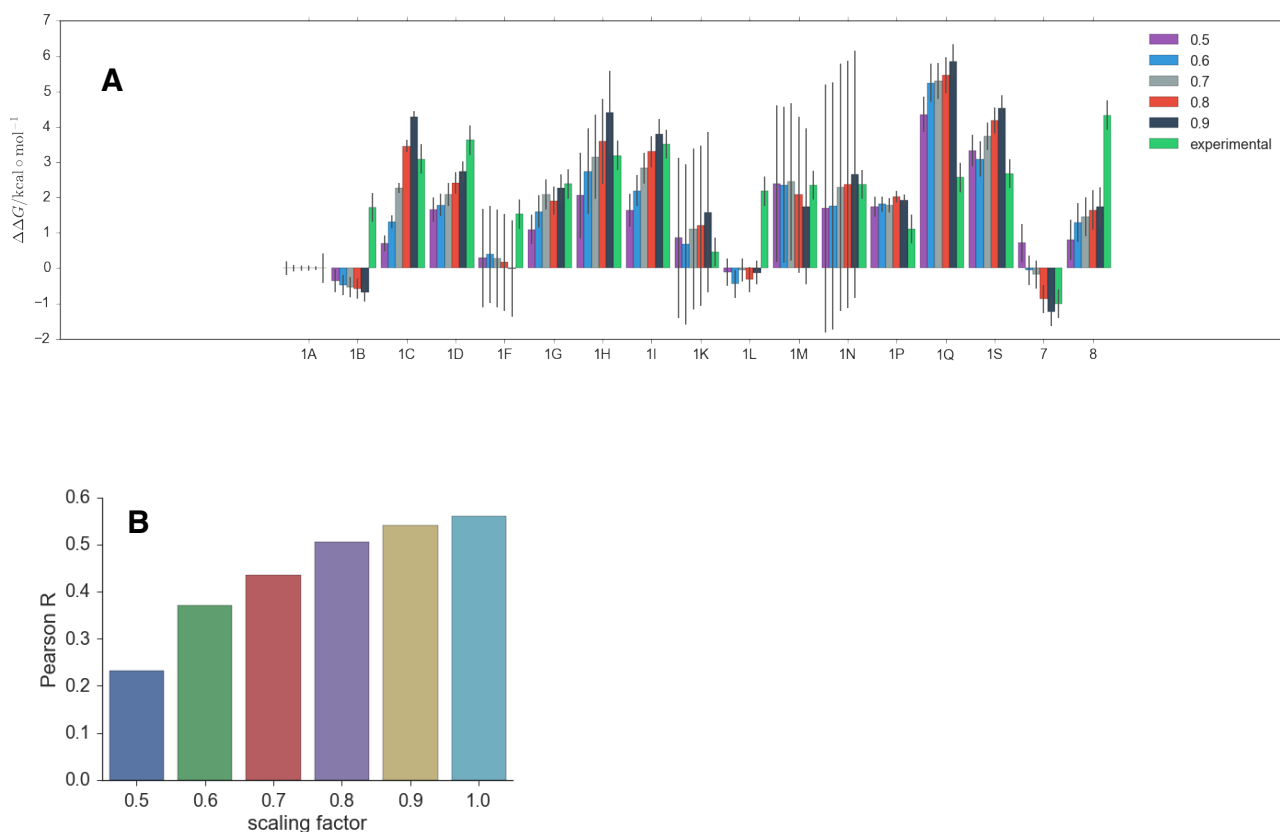

Figure 4: A: Scaling of estimated free energies for LitSet2 compounds, B: resulting correlation for scaling

Table 1: Summary of perturbation  $\lambda$  windows for run1 and run2 of Set1 stage2, if perturbation not listed, then 17 windows were used.

| Number of $\lambda$ windows |                 |
|-----------------------------|-----------------|
| 9                           | 26              |
| FXR99~FXR91                 | FXR95~FXR48     |
| FXR49~FXR46                 | FXR101~FXR91    |
| FXR46~FXR49                 | FXR91~INT02_BM2 |
| FXR98~FXR46                 | FXR96~FXR91     |
| FXR49~INT01                 | INT01~FXR102    |
| INT01~FXR49                 | FXR102~INT01    |
|                             | FXR91~FXR96     |
|                             | INT02_BM2~FXR91 |

### 3 Details of Alchemical free energy protocols for Set1 and Set2

For set1 all perturbations were run twice. The following perturbations were additionally run, using the same number of windows as before and using a forwards and backwards perturbation: **49-91**, **102-INT01**, **INT02\_BM2**, **91**, **96-98** and **100-98**. For set2 data 68 of the perturbations were run using 9 windows, 22 using 17 windows and 18 using 26 windows and a summary can be found in file: `jobtype_set2_stage2.dat`, all perturbations were run twice and perturbation with irregularities were run 3 times. These additional runs were, both in forwards and backwards direction: **10\_BM1-Int01\_BM1**, **76-77\_BM2**, **83\_BM2,82\_BM2** and **79\_BM1B-Int01\_BM1**. All relevant input files for repeating calculations and analysis can be found on github: [https://github.com/michellab/D3R\\_GC2\\_Data](https://github.com/michellab/D3R_GC2_Data).

## 4 Comparison to other Protocols

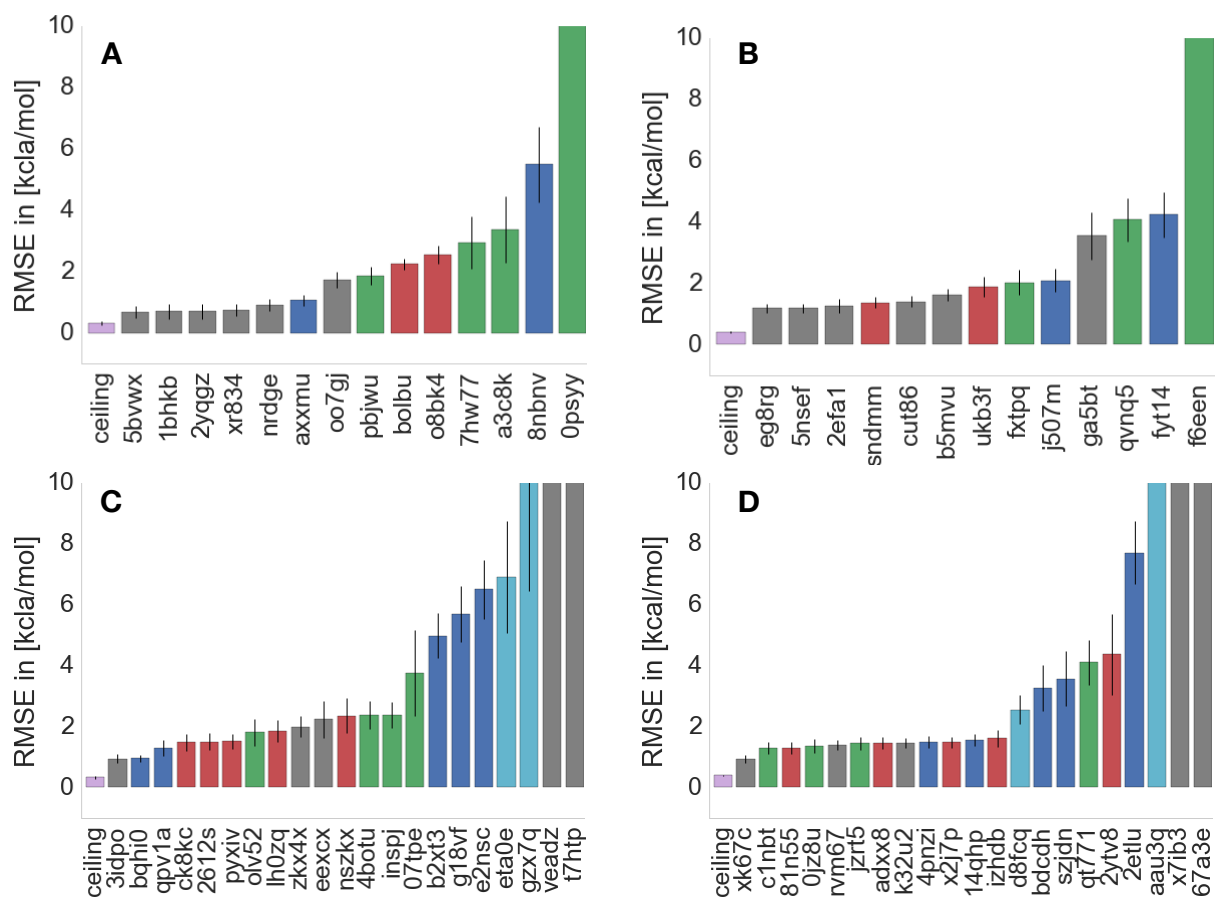

Figure 5: A: set1 stage 1, B: set2 stage 1, C: set1 stage 2, D: set2 stage 2. RMSD deviation of all submission protocols.
